# Supplementary material
Source: Springer Nature journal article supplement (https://www.springermedizin.de/resource/supplementary/12967_2010_735_MOESM6_ESM.pdf/9577410)

**A**

# VX-680(nM) 24h

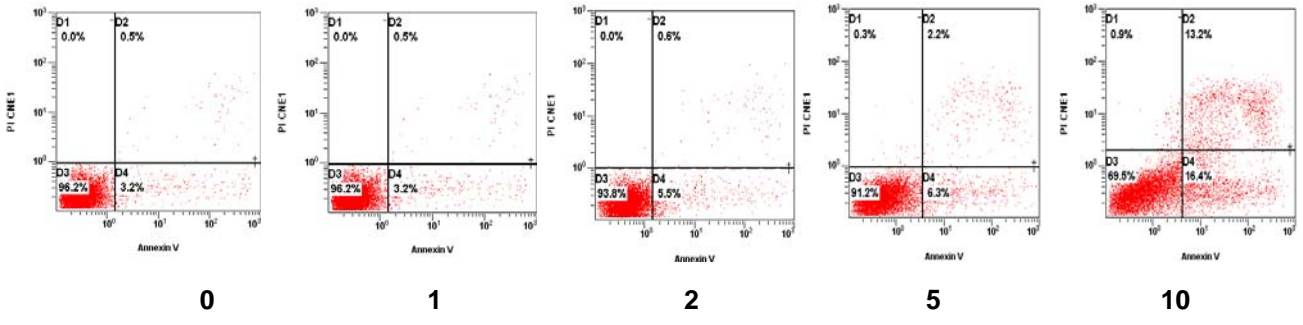

# VX-680(nM) 48h

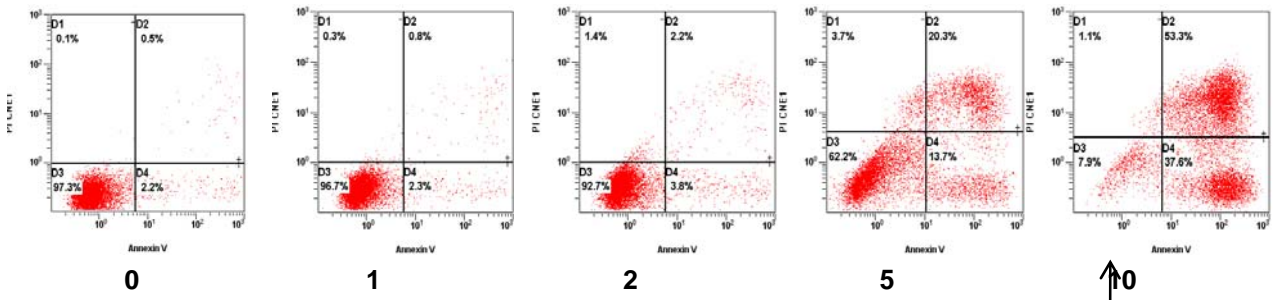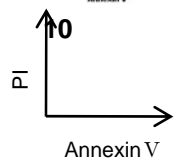**B**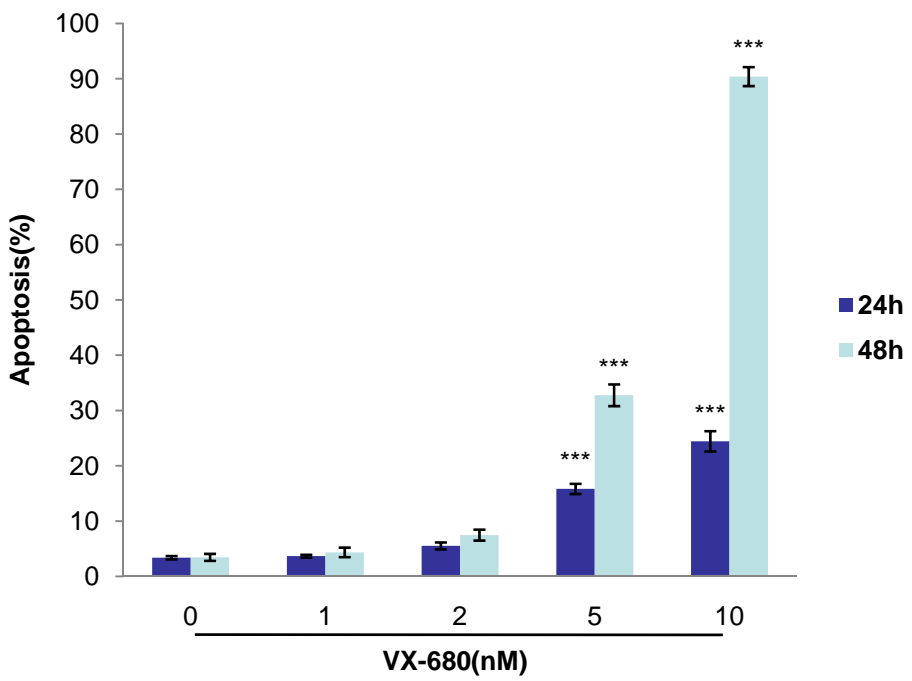

Supplement: MOESM6 [file 9577410]
